# Supplementary material for: Identification of Critical Residues in the Carboxy Terminus of the Dopamine Transporter Involved in the G Protein βγ-Induced Dopamine Efflux
Source: Frontiers journal article supplement (doi:10.3389/fphar.2021.642881), 2021-03-24

**Figure Supplementary S1.** Conformational changes in DAT induced by the formation of the DAT-G $\beta$  $\gamma$  complex. (A) A representative frame of the 100ns of MD simulation is shown. The distance between lateral chains between the residues R85 (ARG85) and D476 (ASP476) is approximately 1.5Å. (B) Transmembrane domain transitions of DAT complexed to G $\beta$  $\gamma$  along the MD simulation. DAT in the beginning of the MD simulation (grey) and after 100ns simulation (cyan).

A

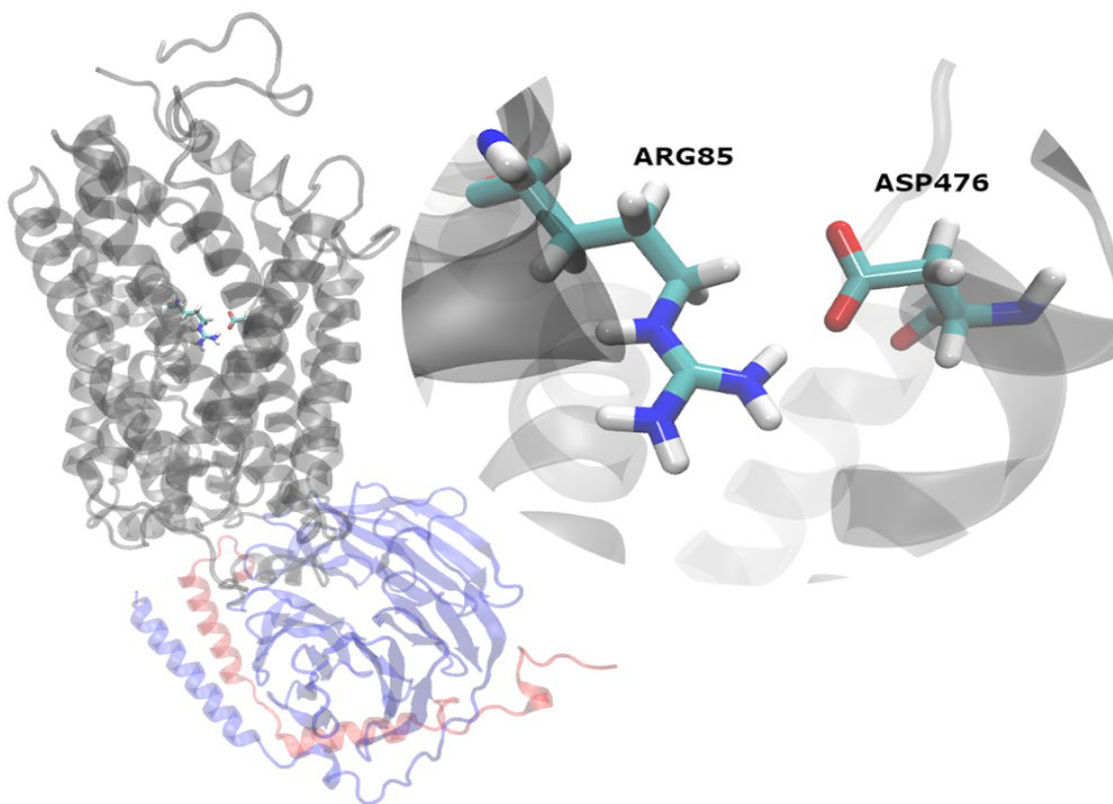

B

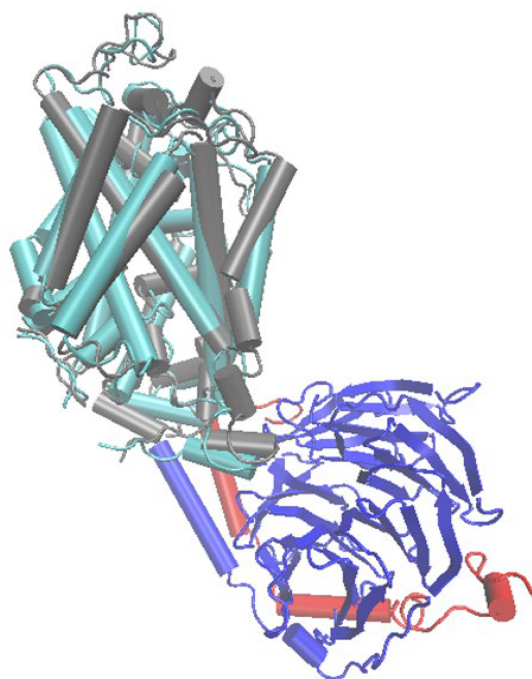

Supplement: downloadfile [file 642881]
